# Supplementary material
Source: Research Square preprint supplement (doi:10.21203/rs.3.rs-7828746/v1)
Supplement: Supplementary file 1 [file 0b1d2454c946cf4711c4f984.docx]

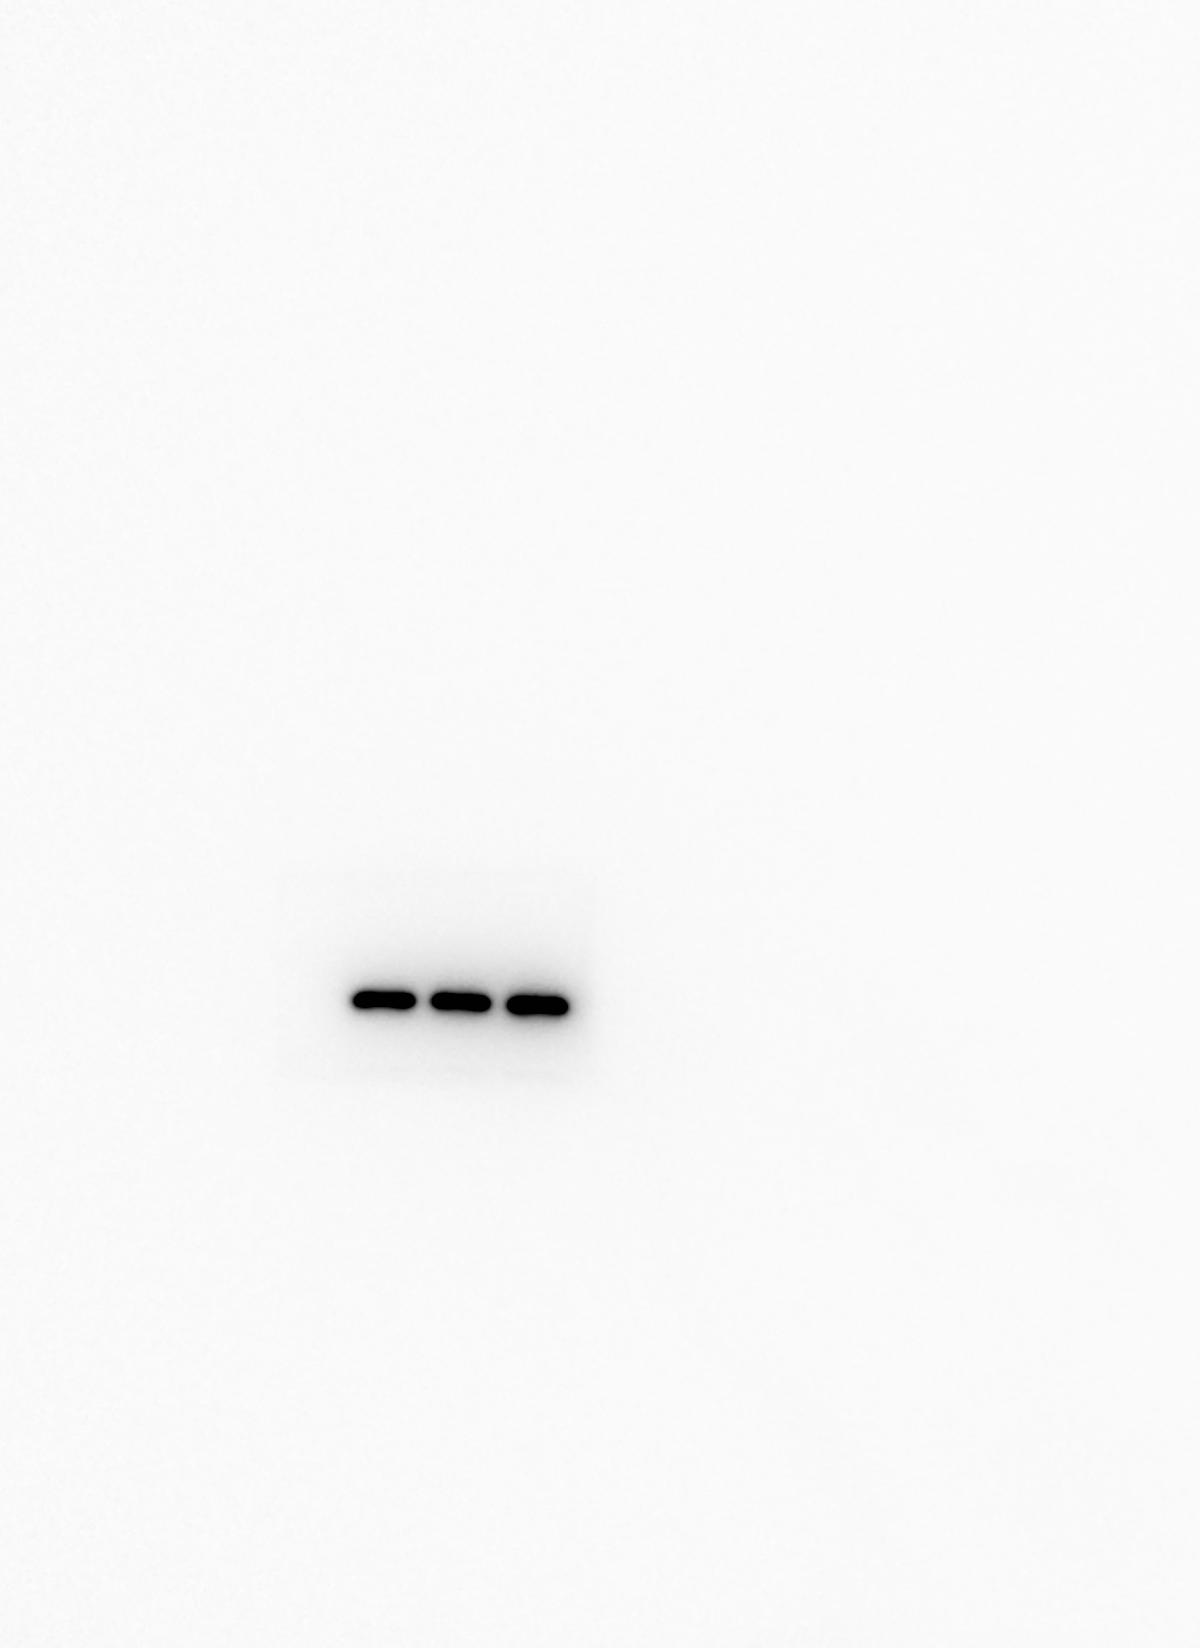

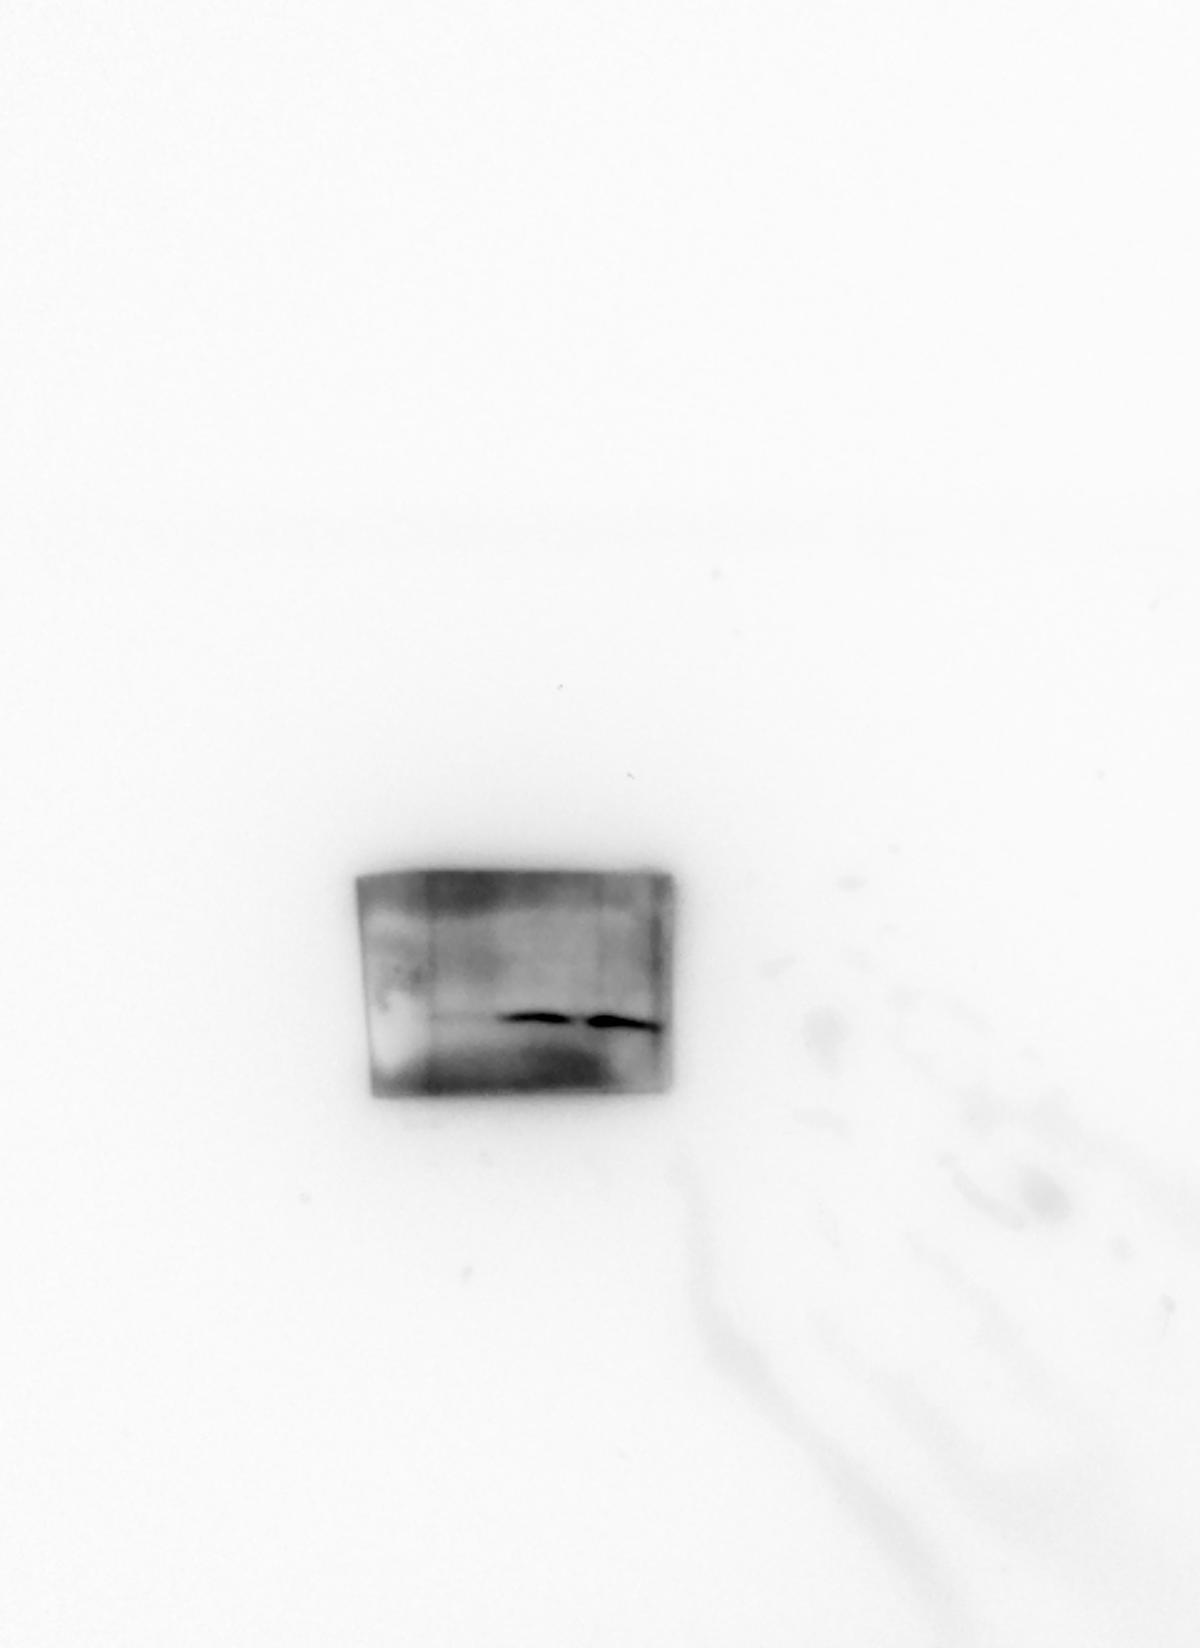


Supplementary Figure 1


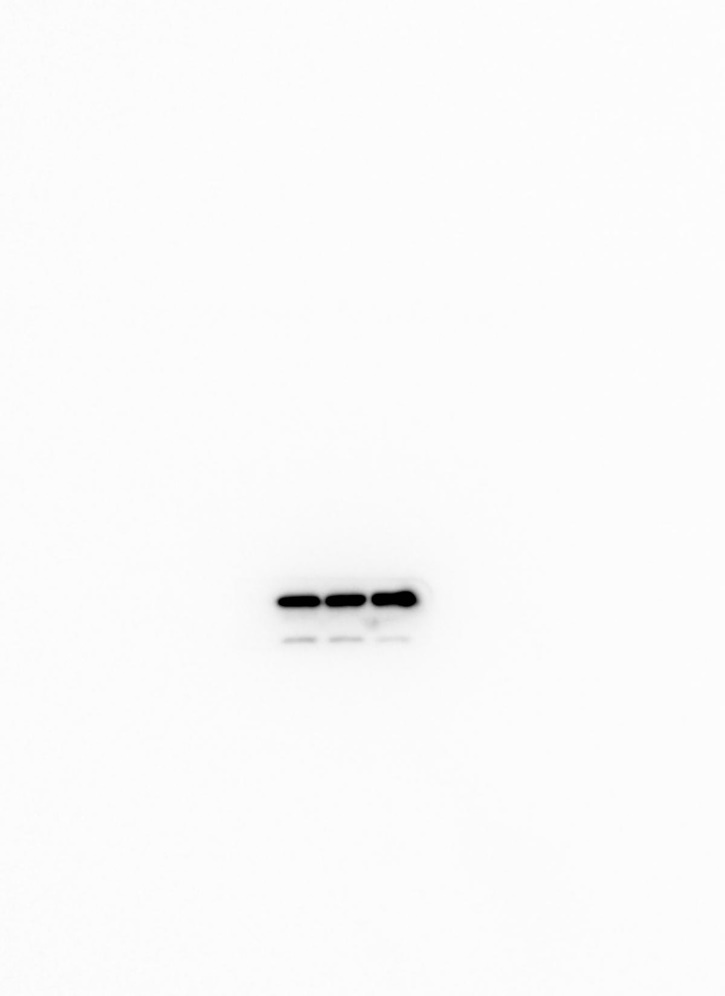


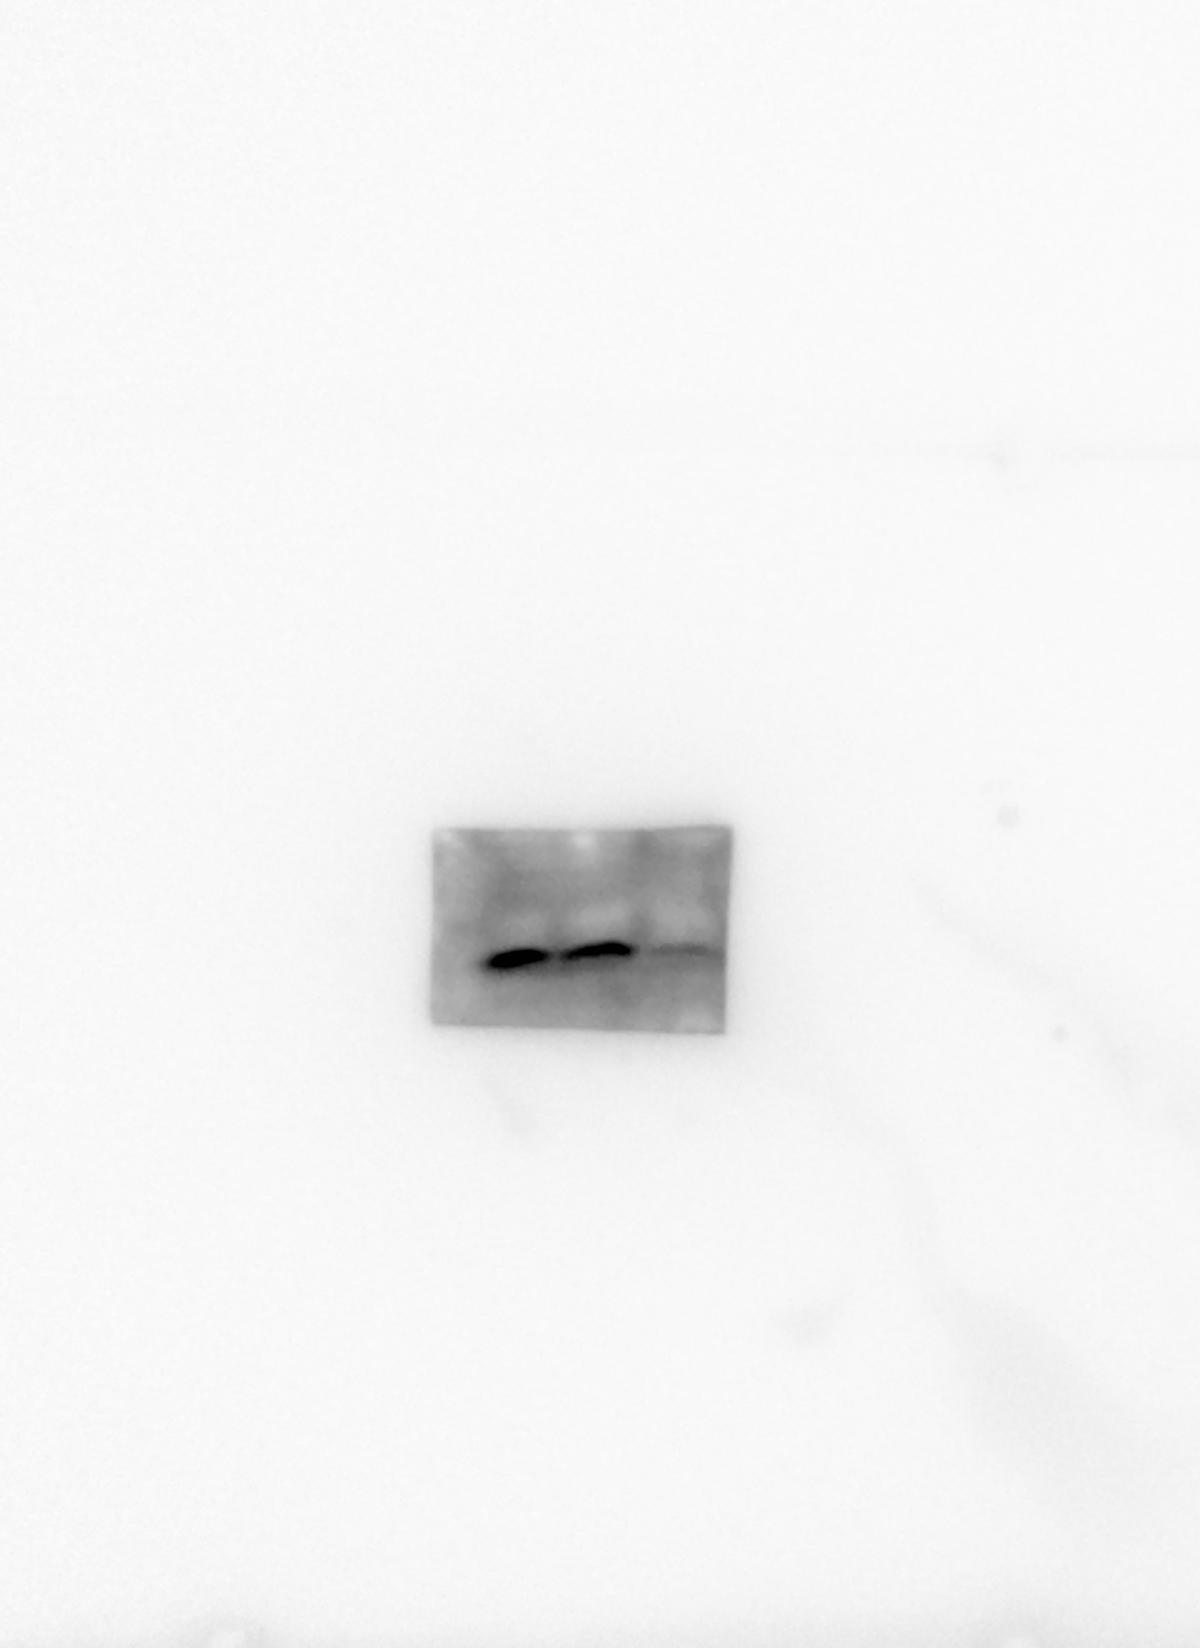


Supplementary Figure 2


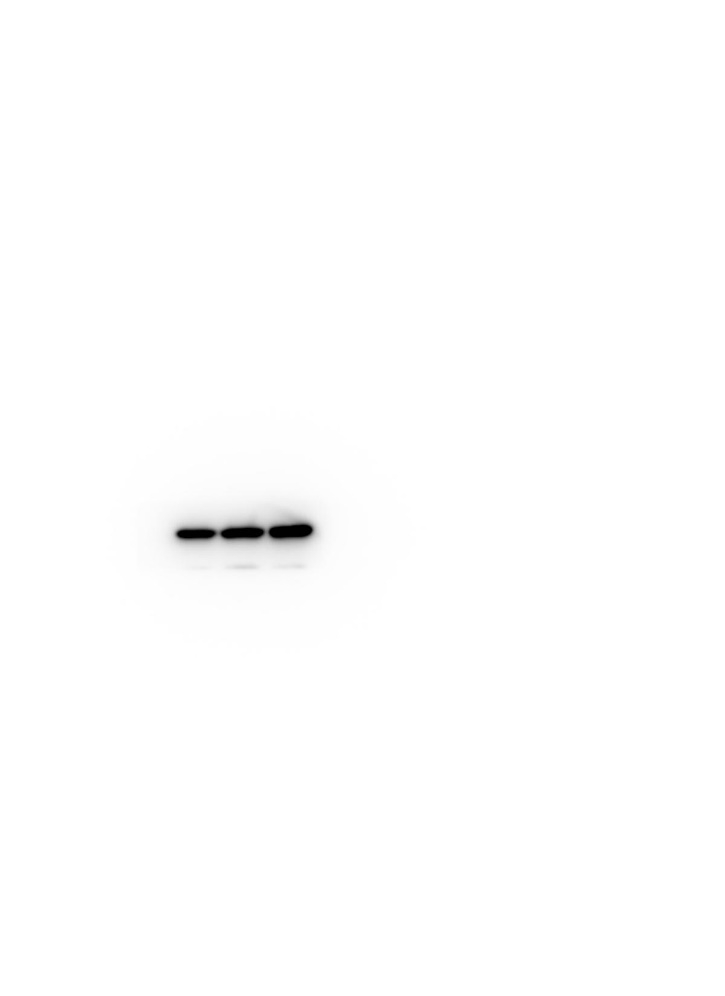

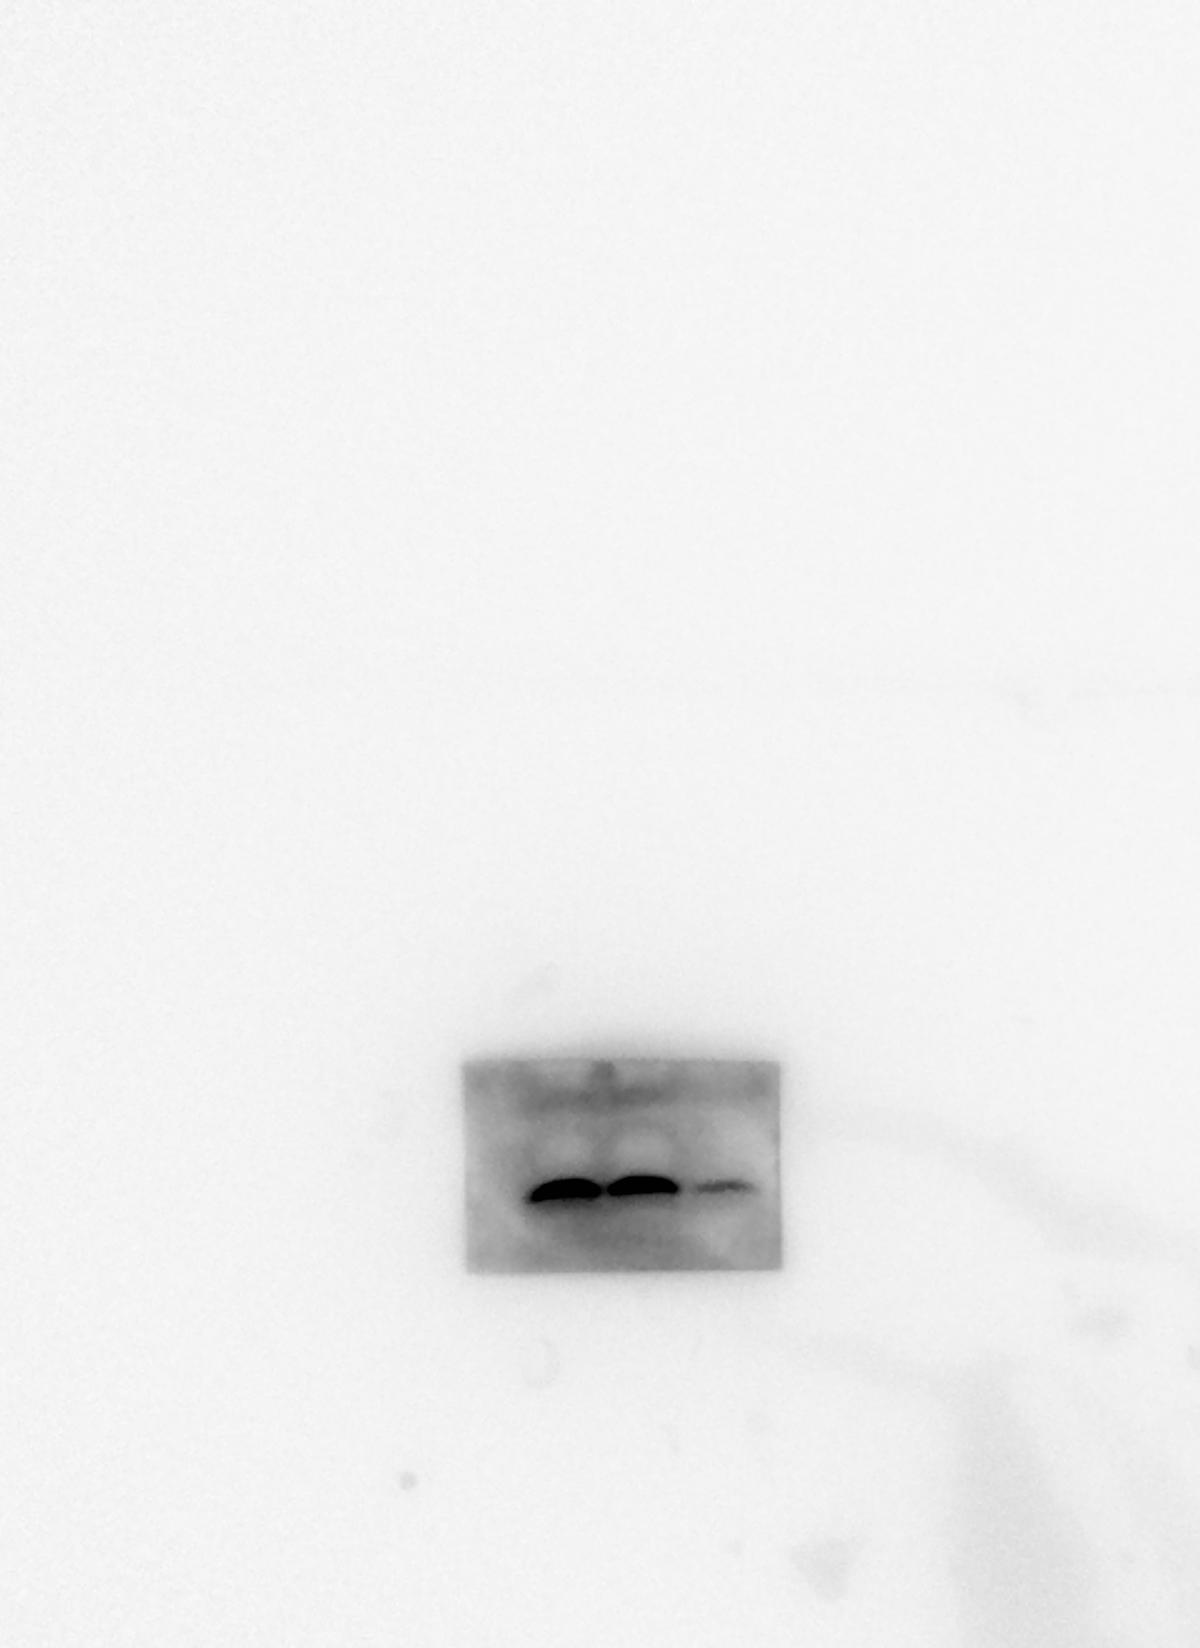


Supplementary Figure 3


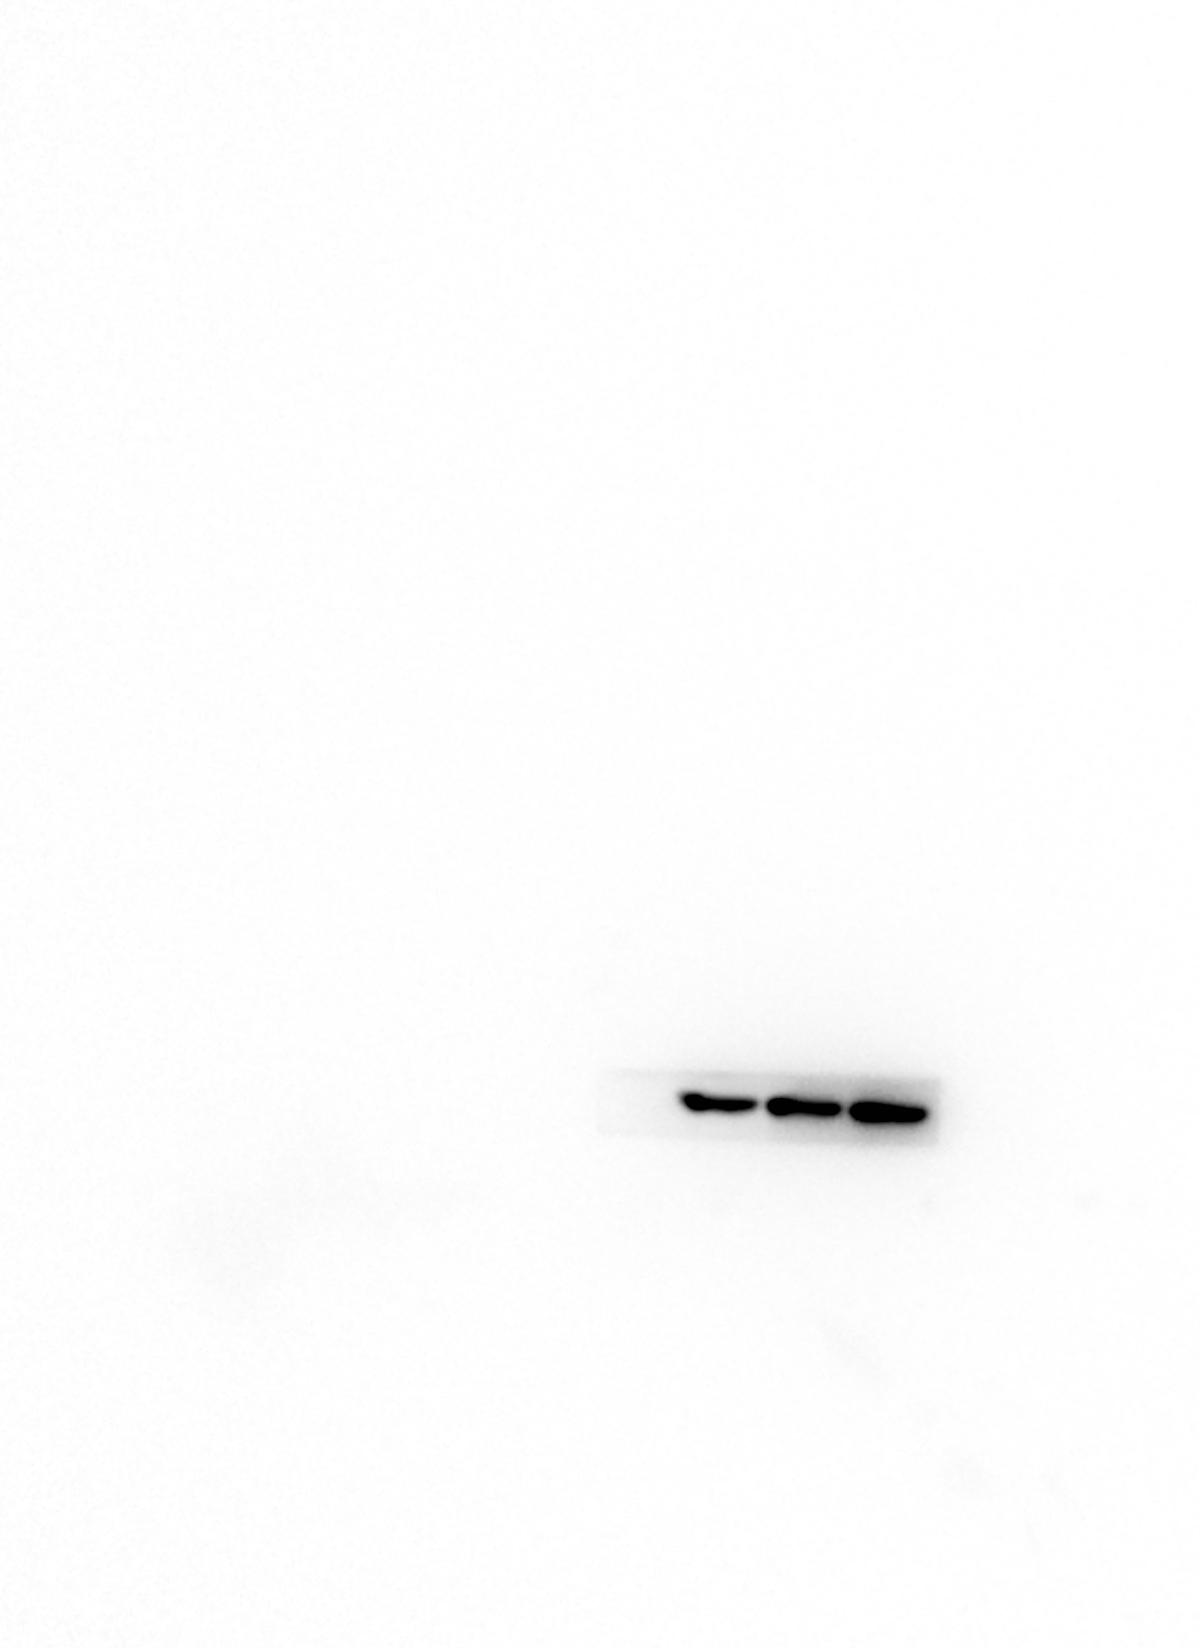


Supplementary Figure
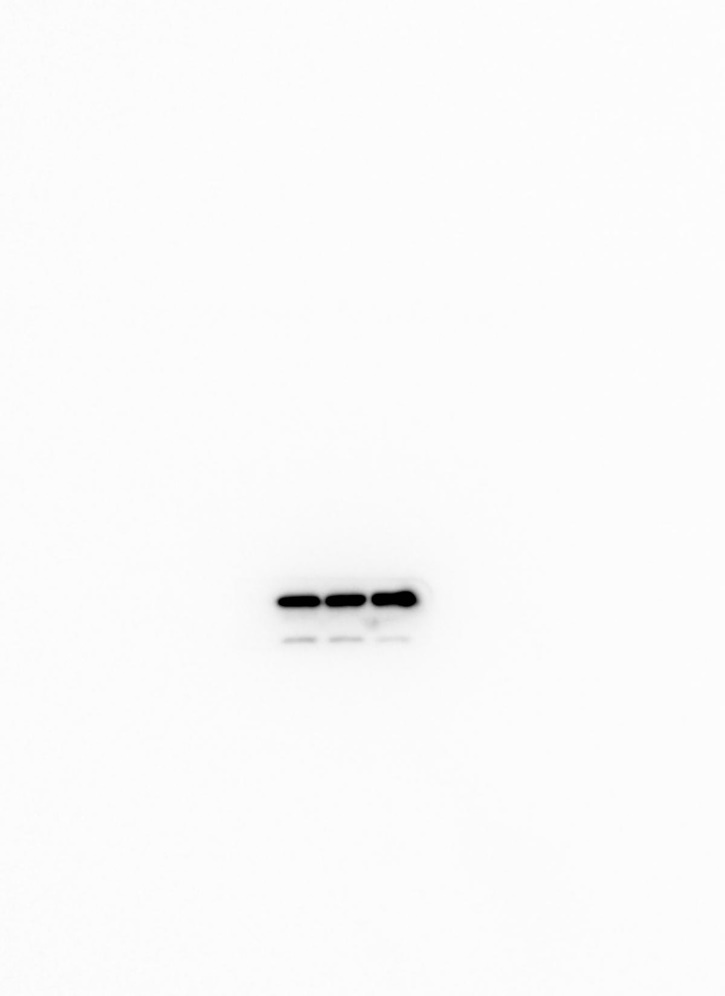

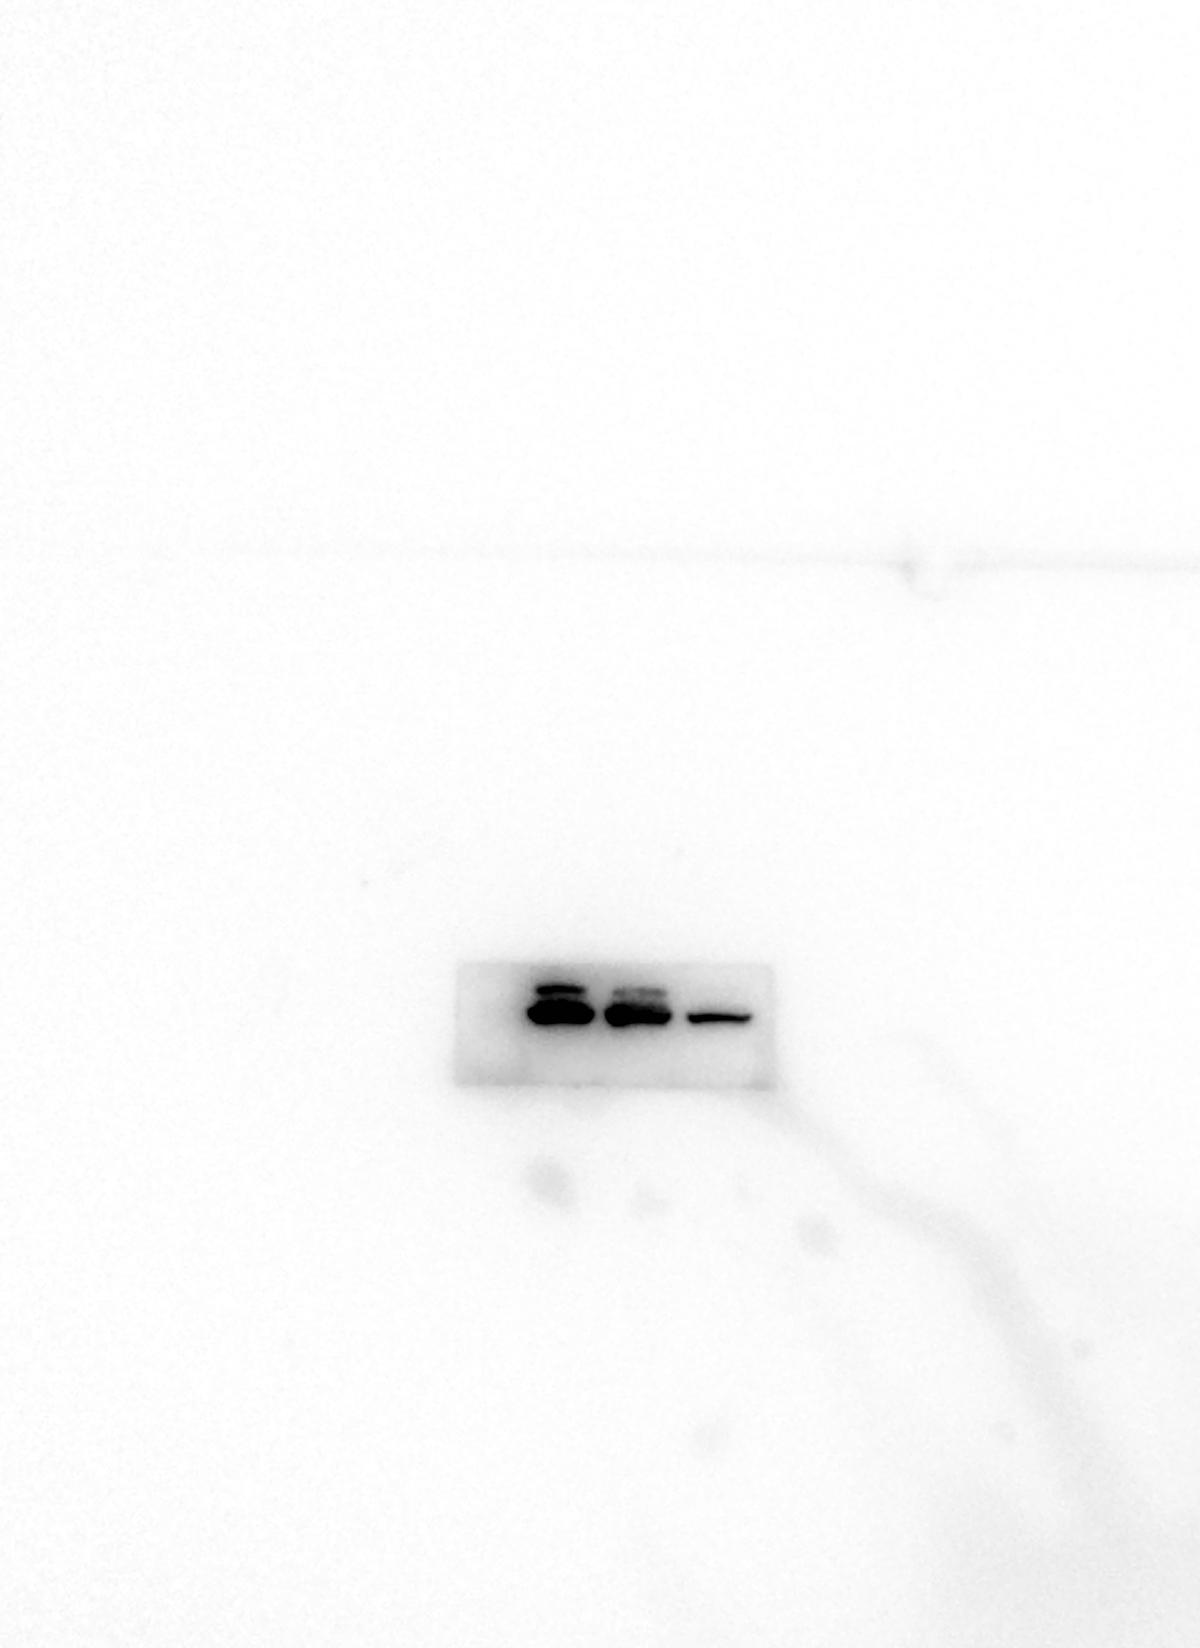
4

Supplementary Figure
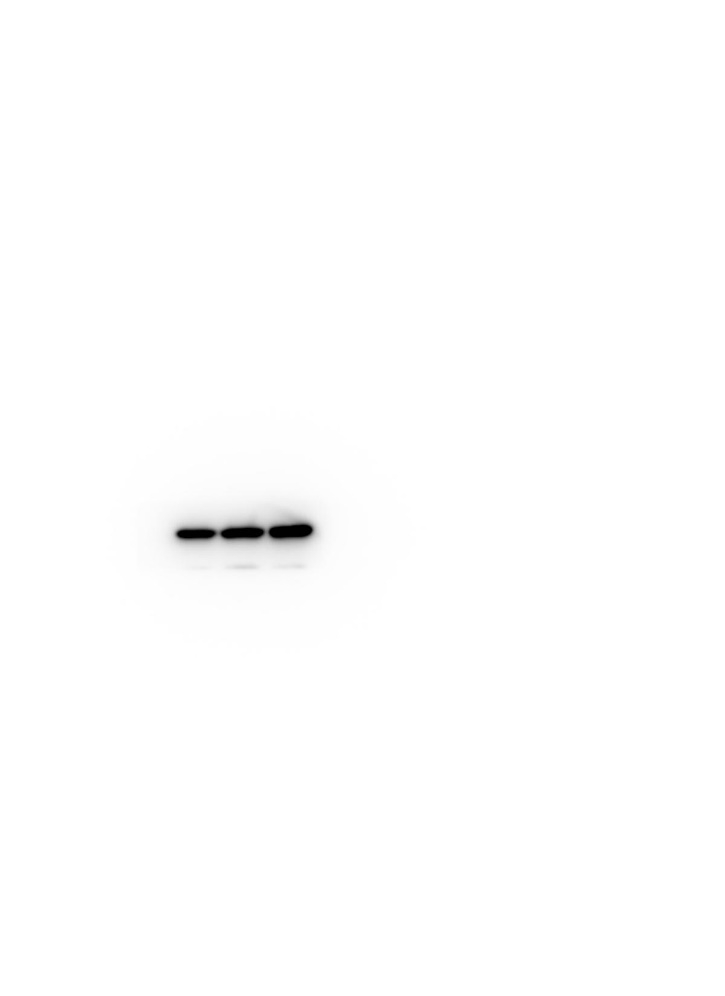

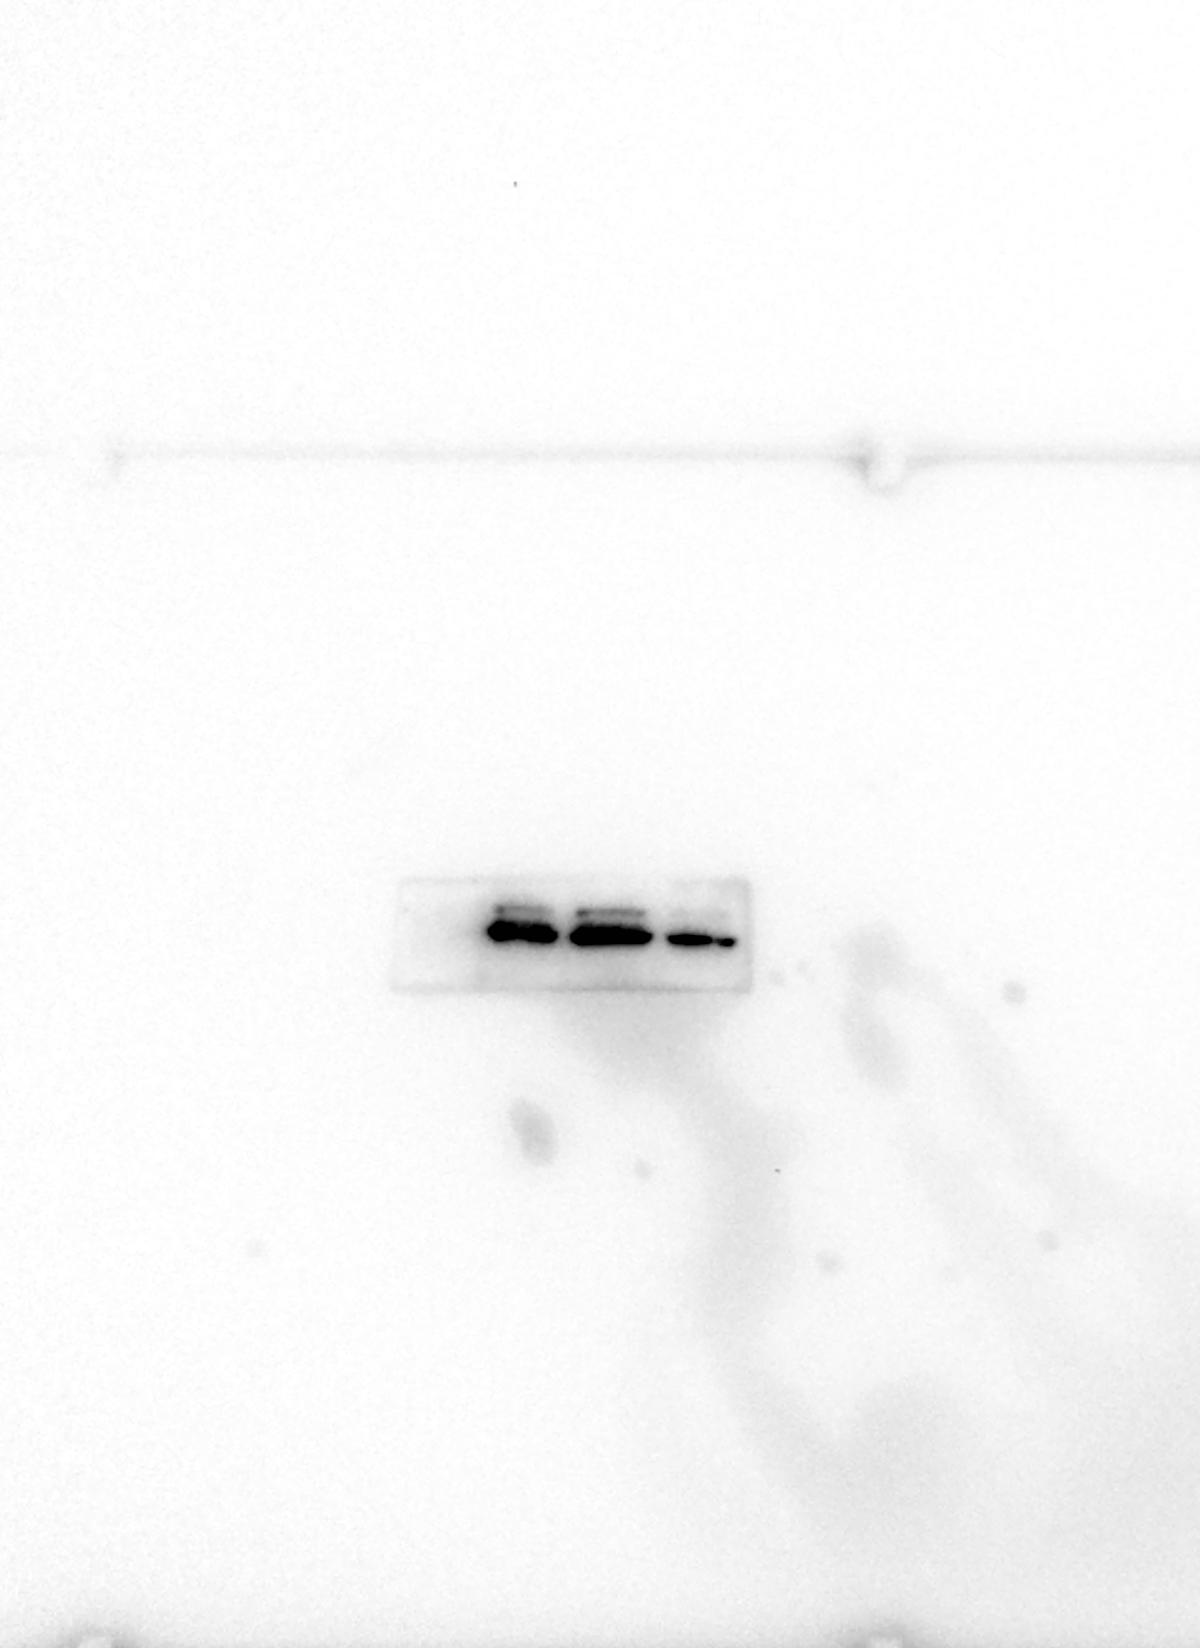

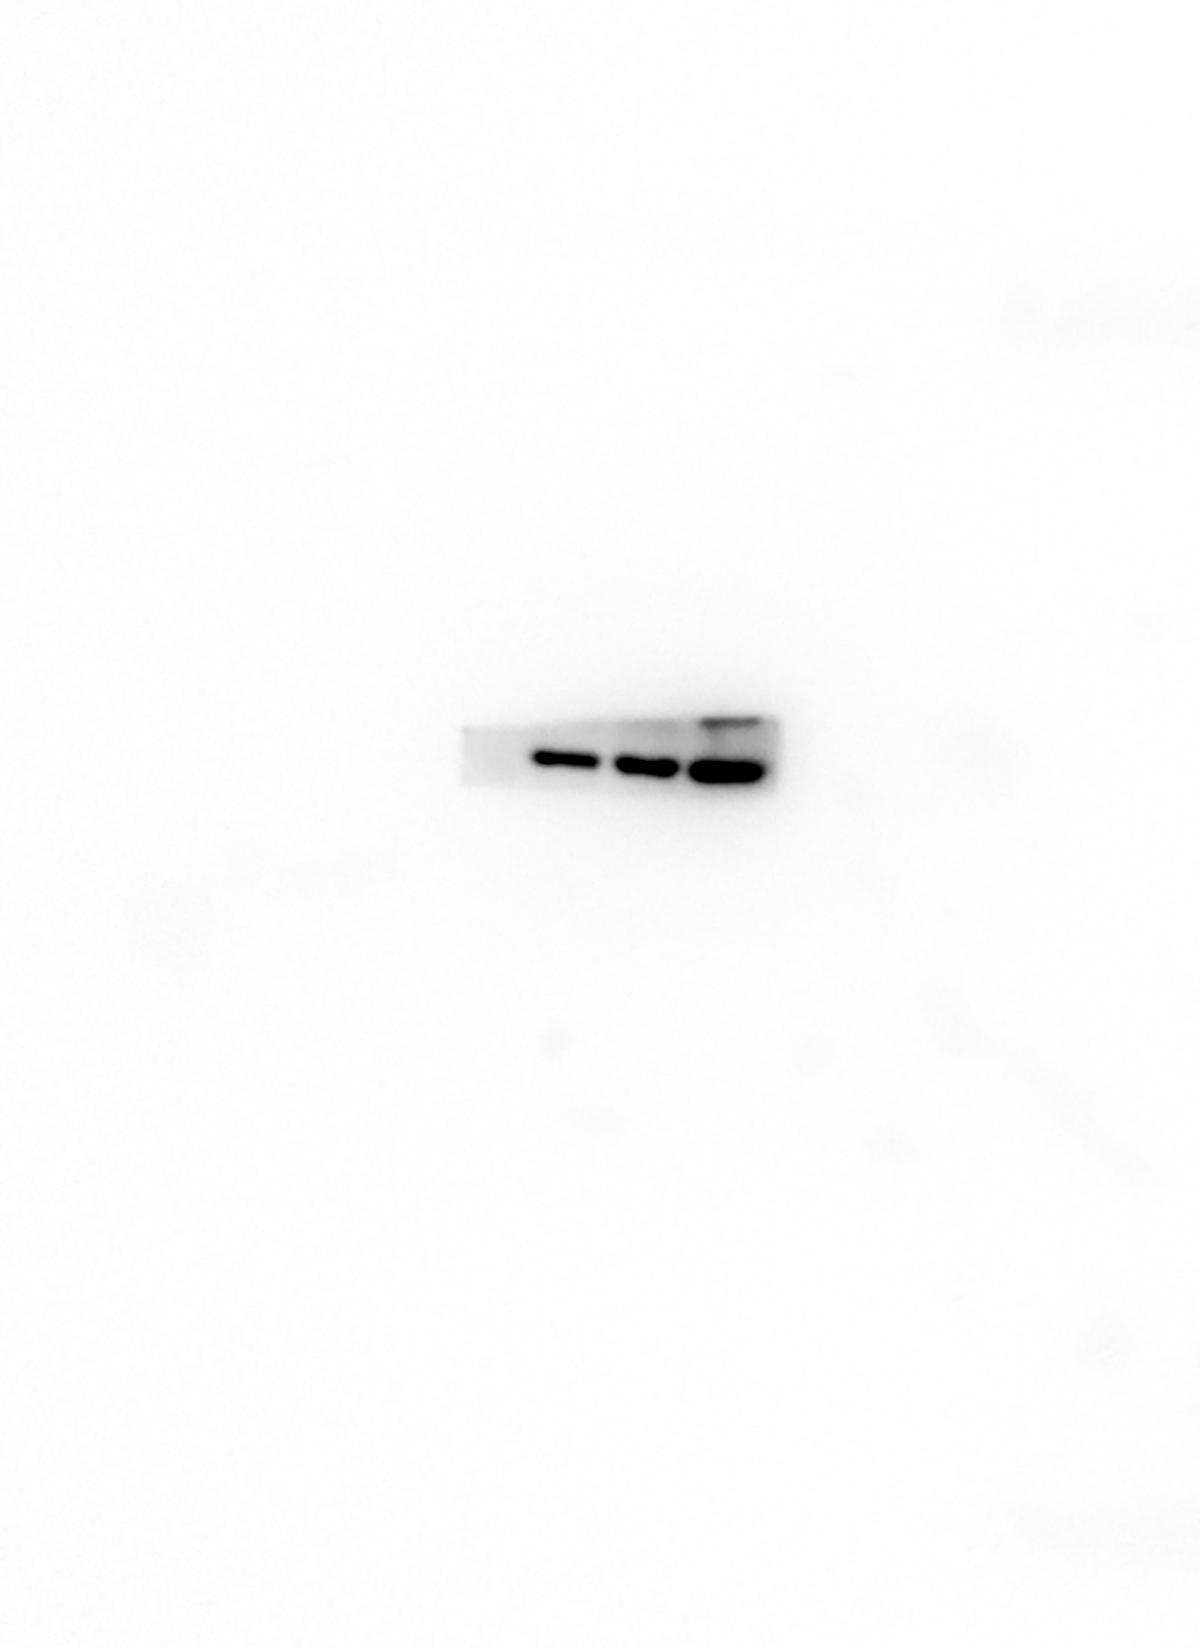
5
